# Supplementary material
Source: PubMed Central journal article supplement (PMC4992618)
Supplement: NIHMS803801-supplement.pdf [file NIHMS803801-supplement.pdf]

## **Supplementary Information**

Myeloid-derived Suppressor Cells In Psoriasis Are an Expanded Population Exhibiting Diverse T cell-Suppressor Mechanisms

Cao et al.,

## Supplementary Figure S1

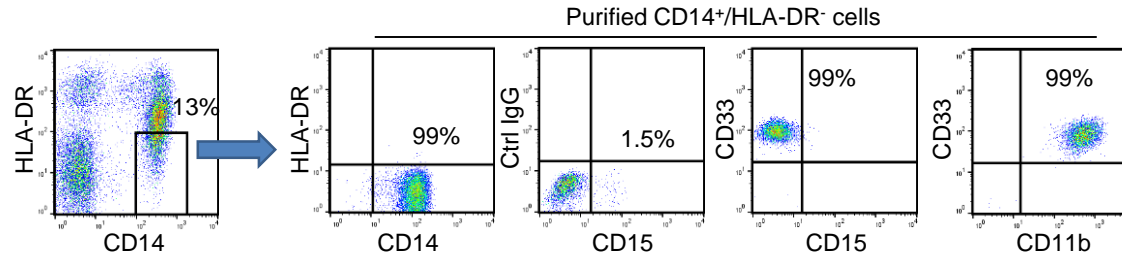

**Supplementary Fig. S1. Expression of varying markers by MDSC purified from blood samples of psoriatic patients.** PBMC isolated from blood of a patient were fluorescently stained for expression of HLA-DR and CD14, in which the window shows CD14<sup>+</sup>HLA-DR<sup>no/low</sup> (which we identified as MDSC). To examine expression of other markers by the cells, the same PBMC were then purified of CD14<sup>+</sup>HLA-DR<sup>no/low</sup> cells, using Ab-magnetic beads, and stained again with anti-CD14 and anti-HLA-DR Ab, and also with other MDSC markers (CD15, CD33, and CD11b). Dot-plots are shown, with % of positive or negative cells. Almost all of purified cells were CD14<sup>+</sup>, HLA-DR<sup>neg</sup>, CD15<sup>neg</sup>, CD33<sup>+</sup>, and CD11b<sup>+</sup>, showing that our CD14<sup>+</sup>HLA-DR<sup>no/low</sup> cells are monocytic MDSC. These data also show high purity (>95%) of our purified MDSC preparation.

## Supplementary Figure S2

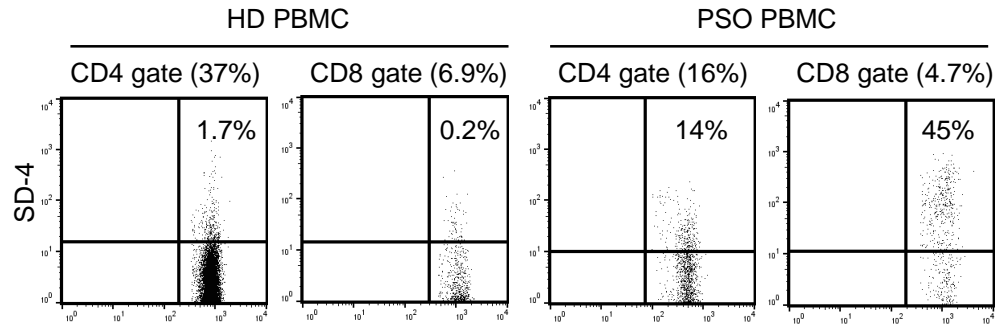

**Supplementary Fig. S2. Expression of syndecan-4 by T cells in healthy donors vs. psoriasis patients.** PBMC isolated from psoriasis patients (PSO) or healthy donors (HD) were analyzed by FACS for expression of syndecan-4 (SD-4) on T cells gated from fluorescent staining with anti-CD4 or anti-CD8 Ab. % CD4 or CD8 gate indicates the frequency in total PBMC. SD-4-positivity is shown by % in total gated T cells. These FACS data are representative of 3 pairs.

## Supplementary Figure S3

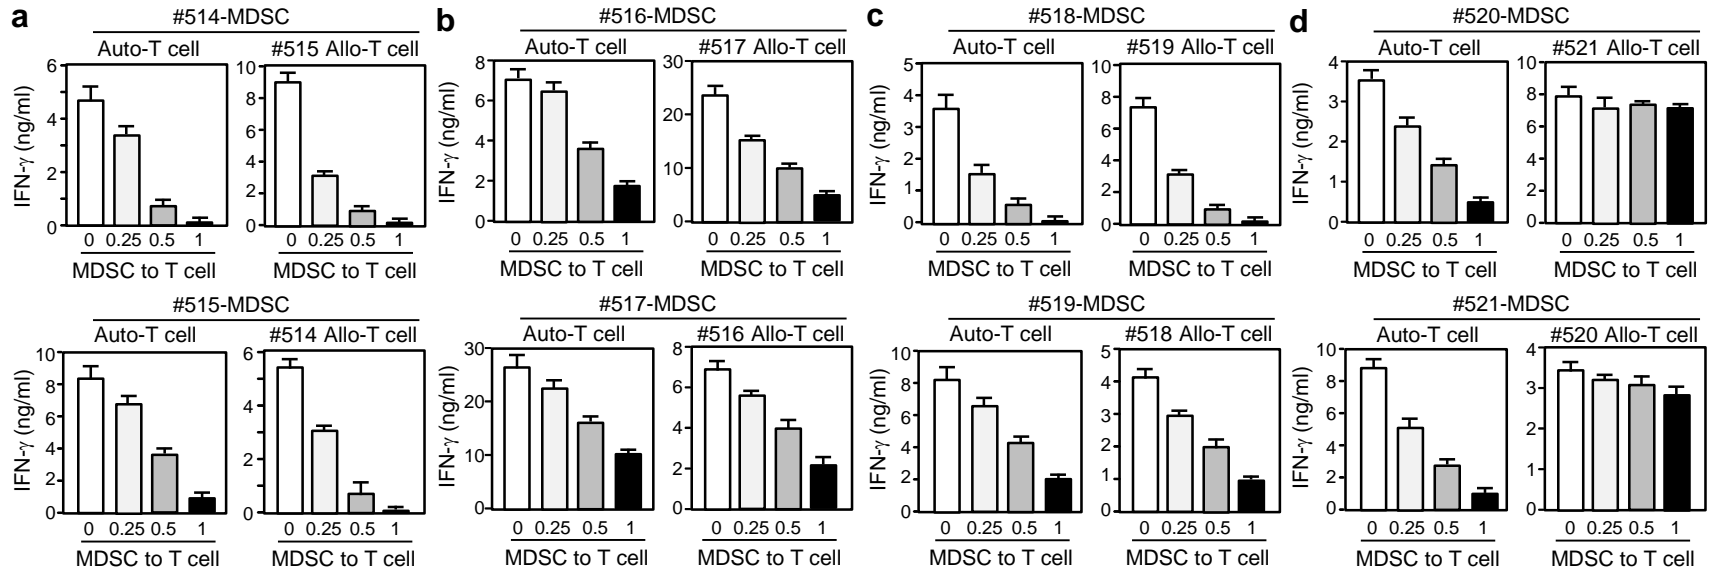

### Supplementary Fig. S3. The suppressor function of psoriatic MDSC to auto- vs. allo-T cells in crisscross of two patients.

Two individual psoriasis patients, who were untreated, were recruited for one crisscross experiment on the same day. MDSC and T cells were purified from blood samples of 2 patients and set up cocultures: MDSC from one patient were cocultured with T cells isolated from the same patient (Auto) or those from the other (Allo) at varying cell ratios. After 5 days in culture, T cell activation was measured by IFN- $\gamma$  secretion. Data shown were obtained from 4 different pairs.

## Supplementary Table S1

| Patient # | Skin        | Among total CD14 <sup>+</sup> cells |                     |                          |
|-----------|-------------|-------------------------------------|---------------------|--------------------------|
|           |             | MDSC                                | DC-HIL <sup>+</sup> | DC-HIL <sup>+</sup> MDSC |
| PSO 113-1 | Nonlesional | 3%                                  | 55%                 | 0%                       |
| PSO 113-1 | Lesional    | 82%                                 | 73%                 | 73%                      |
| PSO 114   | Lesional    | 85%                                 | 67%                 | 68%                      |

**Supplementary Table S1. Summary of confocal analysis of skin explant cultures.** Explant culture of lesional and nonlesional skin biopsies yielded 2-4 x 10<sup>4</sup> cells and 5 x 10<sup>3</sup> emigrated cells, respectively. After immunofluorescent staining of harvested cells, CD14<sup>+</sup> cells (70-80% of total cells) were counted in 15 different microscope views, among of which MDSCs (HLA-DR<sup>neg</sup> cells), DC-HIL<sup>+</sup>, or DC-HIL<sup>+</sup> MDSCs were counted and shown with % of total CD14<sup>+</sup> cells. Note: DC-HIL expression in nonlesional skin was very low (See Figure 5); and both patients were treated with topical corticosteroids.

## Supplementary Table S2

| Frequency                       | PASI  | Serum IL-17A | Serum IFN- $\gamma$ |
|---------------------------------|-------|--------------|---------------------|
| % DC-HIL <sup>+</sup> MDSC/PBMC | 0.130 | 0.08         | - 0.108             |
| % MDSC/PBMC                     | 0.106 | 0.08         | - 0.168             |

**Supplementary Table S2.** Correlation of DC-HIL<sup>+</sup> MDSC or MDSC expansion (%DC-HIL<sup>+</sup> MDSC/PBMC or % MDSC/PBMC) with different parameters among total psoriasis patients examined was analyzed using Spearman's coefficient, and r values are shown in this table. Note that sorting into two groups (untreated and treated patients) did not make a significant difference in the r values.
